# Supplementary material for: PGA: power calculator for case-control genetic association analyses
Source: PubMed Central journal article supplement (PMC2387159; doi:10.1186/1471-2156-9-36), 2008-05-13
Supplement: 1471-2156-9-36-S2.pdf [file 1471-2156-9-36-S2.pdf]

**Table 1.** Major features of four commonly used power software for case-control association studies.

| Software name                                                           | GPC                                                                                                                 | CaTS                                                                                                  | PAWE 3D                                                                                                                   | PGA                                                                                   |
|-------------------------------------------------------------------------|---------------------------------------------------------------------------------------------------------------------|-------------------------------------------------------------------------------------------------------|---------------------------------------------------------------------------------------------------------------------------|---------------------------------------------------------------------------------------|
| URL                                                                     | <a href="http://pngu.mgh.harvard.edu/~purchell/gpc/cc2.html">http://pngu.mgh.harvard.edu/~purchell/gpc/cc2.html</a> | <a href="http://www.sph.umich.edu/csg/abecasis/CaTS/">http://www.sph.umich.edu/csg/abecasis/CaTS/</a> | <a href="http://linkage.rockefeller.edu/pawe3d/pawe3dmain.html">http://linkage.rockefeller.edu/pawe3d/pawe3dmain.html</a> | <a href="http://dceg.cancer.gov/bb/tools/pga">http://dceg.cancer.gov/bb/tools/pga</a> |
| Web-based                                                               | √                                                                                                                   |                                                                                                       | √                                                                                                                         |                                                                                       |
| Downloadable GUI                                                        |                                                                                                                     | √                                                                                                     |                                                                                                                           | √                                                                                     |
| Power and sample size calculations for SNP data                         | √                                                                                                                   | √                                                                                                     | √                                                                                                                         | √                                                                                     |
| Power and sample size calculations for haplotype data                   |                                                                                                                     |                                                                                                       |                                                                                                                           | √                                                                                     |
| Power and sample size calculations for multi-stages studies             |                                                                                                                     | √                                                                                                     |                                                                                                                           |                                                                                       |
| Accounts for linkage disequilibrium between marker and causative allele |                                                                                                                     |                                                                                                       | √                                                                                                                         | √                                                                                     |
| Calculate minimal detectable relative risk (MDRR)                       |                                                                                                                     |                                                                                                       |                                                                                                                           | √                                                                                     |
| Analyze power for a range of parameters                                 |                                                                                                                     |                                                                                                       | √                                                                                                                         | √                                                                                     |
| Has a graphical output                                                  |                                                                                                                     | √                                                                                                     | √                                                                                                                         | √                                                                                     |
| Power and sample size calculations for gene-gene interactions           | √                                                                                                                   |                                                                                                       |                                                                                                                           |                                                                                       |
| Accounts for phenotypic and genotypic errors                            |                                                                                                                     |                                                                                                       | √                                                                                                                         |                                                                                       |
| Available as editable code                                              |                                                                                                                     |                                                                                                       |                                                                                                                           | √                                                                                     |
